# Supplementary figures and images for: Real-time reliable detection of adrenocorticotropic hormone using reduced graphene oxide field-effect transistors
Source: Royal Society of Chemistry journal article supplement (doi:10.1039/d5ay00312a), 2025-01-01

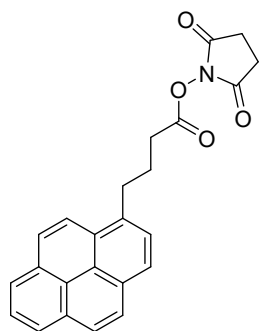

Figure S1. The chemical structure of PASE

Supplement: d5ay00312a2.pdf [file d5ay00312a2.pdf]

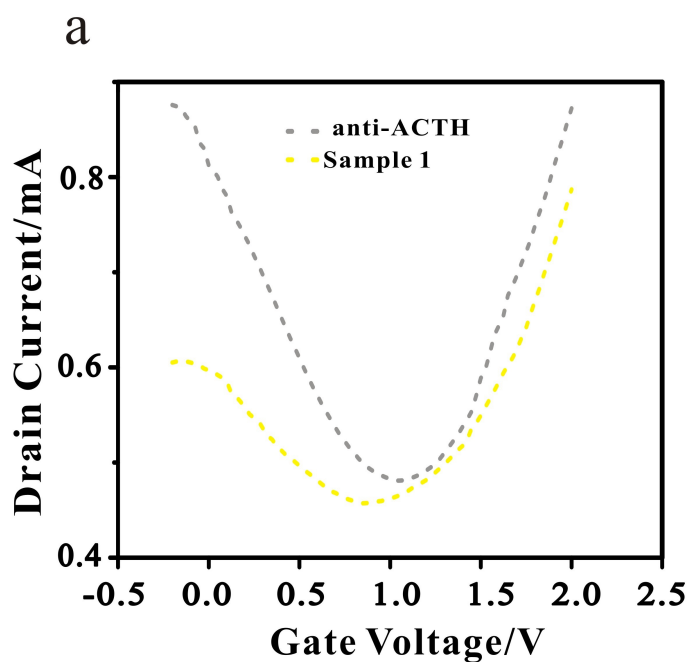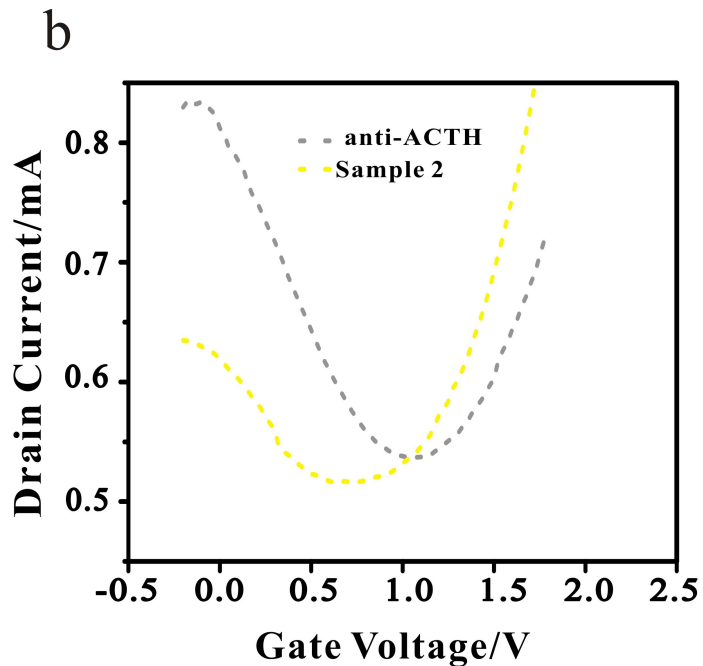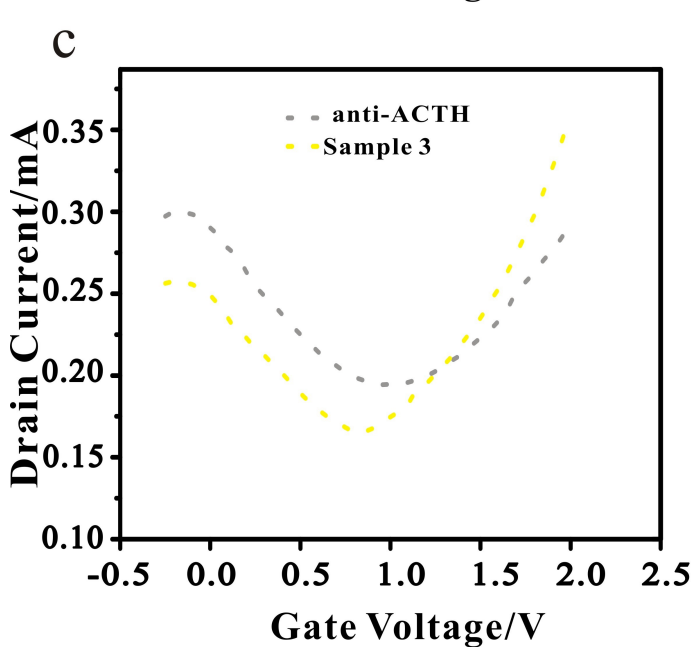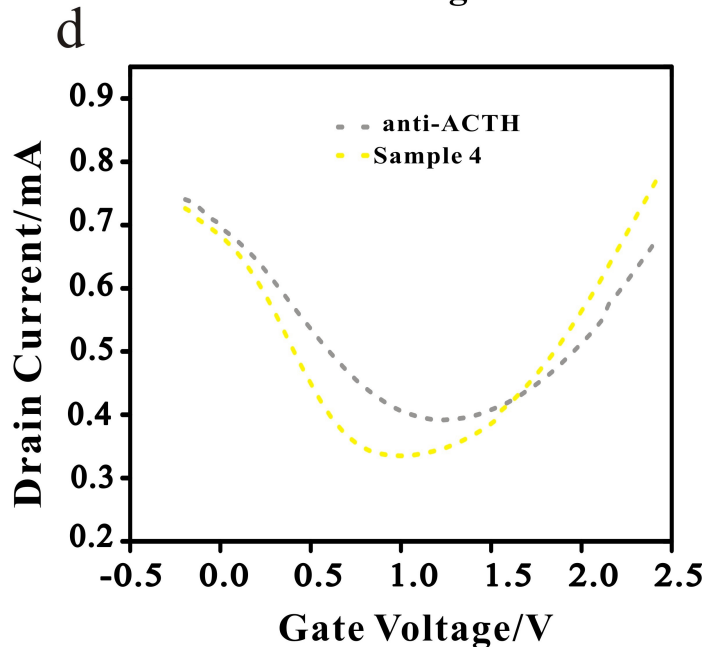

Supplement: d5ay00312a5.pdf [file d5ay00312a5.pdf]
